# Supplementary material for: The Contribution of Extruded and Fermented Wheat Bran to the Quality Parameters of Wheat Bread, Including the Profile of Volatile Compounds and Their Relationship with Emotions Induced for Consumers
Source: MDPI journal article supplement (doi:10.3390/foods10102501), 2021-10-18
Supplement: s1 [file s1]

**Table S1.** Acidity, microbiological parameters, and sugar concentration in processed wheat bran.

| Samples                   | pH                          |         | TTA, °N  |          | Lactic Acid Content, g/100 g |         | LAB                     | M/Y | TBC | TEC | Fructose | Glucose | Sucrose | Maltose |
|---------------------------|-----------------------------|---------|----------|----------|------------------------------|---------|-------------------------|-----|-----|-----|----------|---------|---------|---------|
|                           | Duration of Fermentation, h |         |          |          | L(+)                         | D(–)    | log <sub>10</sub> CFU/g |     |     |     |          |         |         |         |
|                           | 0                           | 24      | 0        | 24       |                              |         | g/100 g                 |     |     |     |          |         |         |         |
|                           |                             |         |          |          |                              |         |                         |     |     |     |          |         |         |         |
| W <sub>ex130/25/Lp1</sub> | 4.22                        | 3.90    | 0.423    | 0.322    | 8.46                         | 4.29    | 8.63                    | nd  | nd  | nd  | nd       | nd      | nd      |         |
|                           | ± 0.02c                     | ± 0.10b | ± 0.009c | ± 0.014a | ± 0.11d                      | ± 0.07b | ± 0.12ab                |     |     |     |          |         |         |         |

W—wheat bran; Lu—fermented with *L. uvarum*; <sub>ex130/screwspeed25</sub>—extruded at 130 °C and 25 rpm; TTA—total titratable acidity; LAB—lactic acid bacteria; M/Y—mould and yeast count; TBC—total bacteria count; TEC—total enterobacteria count; CFU—colony-forming units; nd—not detected; —not analysed. Data expressed as mean values ( $n = 5$ ) ± standard deviation (SD). a–e—means within a lines with different letters are significantly different ( $p \leq 0.05$ )

**Table S2.** Amino acid concentration (g/100 g) in processed wheat bran.

| Samples                  | Asp    | Glu    | Asn | Ser    | His    | Gly    | Thr    | Arg    | Ala    | Tyr    | Cys    | Val    | Met    | Trp    | Phe    | Ile    | Leu    | Lys    | Pro    |
|--------------------------|--------|--------|-----|--------|--------|--------|--------|--------|--------|--------|--------|--------|--------|--------|--------|--------|--------|--------|--------|
| W <sub>ex130/25/Lu</sub> | 0.48 ± | 1.47 ± | nd  | 0.26 ± | 0.11 ± | 0.26 ± | 0.26 ± | 0.27 ± | 0.23 ± | 0.17 ± | 0.40 ± | 0.34 ± | 0.13 ± | 0.29 ± | 0.22 ± | 0.32 ± | 0.11 ± | 0.34 ± | 0.24 ± |
|                          | 0.04a  | 0.08a  |     | 0.02a  | 0.01a  | 0.02a  | 0.02a  | 0.02a  | 0.02a  | 0.01a  | 0.03ab | 0.03a  | 0.01a  | 0.02a  | 0.02a  | 0.03a  | 0.01a  | 0.03b  | 0.02b  |

W—wheat bran; Lu—fermented with *L. uvarum*; <sub>ex130/screwspeed25</sub>—extruded at 130 °C and 25 rpm; nd—not detected; Asp—aspartic acid; Ala—alanine; Gly—glycine; Val—valine; Leu—leucine; Ile—isoleucine; Thr—threonine; Ser—serine; Pro—proline; Asn—asparagine; Met—methionine; Glu—glutamine; Phe—phenylalanine; Lys—lysine; His—histidine; Arg—arginine; Tyr—tyrosine; Trp—tryptophan; Cys—cysteine. Data expressed as mean values ( $n = 5$ ) ± standard deviation (SD). a–f—means within a lines with different letters are significantly different ( $p \leq 0.05$ ).

**Table S3.** Biogenic amines concentration (mg/kg) in processed wheat bran.

| Samples                  | PUT         | CAD         | HIST       | SPRM        | TYR | PHE | SPRMD |
|--------------------------|-------------|-------------|------------|-------------|-----|-----|-------|
| W <sub>ex130/25/Lu</sub> | 91.3 ± 2.1a | 33.8 ± 2.1a | 9.2 ± 0.3a | 35.9 ± 2.7b | nd  | nd  | nd    |

W—wheat bran; Lu—fermented with *L. uvarum*; <sub>ex130/25</sub>—extruded at 130 °C and 25 rpm; PUT—putrescine; CAD—cadaverine; HIST—histamine; SPRM—spermine; PHE—phenylethylamine; TYR—tyramine; SPRMD—spermidine; nd—not detected. Data are represented as means ( $n = 5$ ) ± SE. a–f—mean values within a lines denoted with different letters are significantly different ( $p \leq 0.05$ ).

**Table S4.** Mycotoxin concentration (µg/kg) in processed wheat bran.

| Samples                  | AOH    | AME   | 17-DMAG | 15-DON | DON    | D3G    | 15ACS   | ENN A  | ENN A1 | FB1   | FB2 | MEL   | STC   | OTB | OTA | T-2 | HT-2  | FUSX | Neo   | AFB1 |
|--------------------------|--------|-------|---------|--------|--------|--------|---------|--------|--------|-------|-----|-------|-------|-----|-----|-----|-------|------|-------|------|
| W <sub>ex130/25/Lu</sub> | 1.31 ± | 1.4 ± | 0.78    |        | 19.9 ± | 0.44 ± | 1.81    | 1.29 ± | 0.26±  | 0.08± |     | 0.02± | 1.27± |     |     |     | 1.17± |      | 0.05± |      |
|                          | 0.12c  | 0.09d | ± 0.06b | nd     | 0.14a  | 0.02b  | ± 0.15b | 0.09a  | 0.02a  | 0.01a | nd  | 0.01a | 0.09e | nd  | nd  | nd  | 0.06d | nd   | 0.02a | nd   |

W—wheat bran; Lu—fermented with *L. uvarum*; <sub>ex130/screwspeed25</sub>—extruded at 130 °C and 25 rpm; AOH—alternariol; AME—alternariol monomethyl ether; 17-DMAG—17-dimethylaminoethylamino-17-demethoxygeldanamycin; 15-DON—15-acetyldeoxynivalenol; MEL—meleagrins; Neo—neosolaniol; 15ACS—15-acetoxyscirpenol; ENN A—enniatin A; ENN A1—enniatin A1; FB1—fumonisins B1; FB2—fumonisins B2; DON—deoxynivalenol; STC—sterigmatocystin; OTB—ochratoxin B; FUSX—fusarenon X; T-2—T-2 toxin; HT-2—HT-2 toxin; OTA—ochratoxin A; D3G—deoxynivalenol-3-glucoside; AFB1—aflatoxin B1; nd—not detected. Data are presented as means ( $n = 5$ ) ± standard deviation (SD). a–i—means within a lines with different letters are significantly different ( $p \leq 0.05$ ).
